# Supplementary material for: A new family of “megaphages” abundant in the marine environment
Source: PubMed Central journal article supplement (PMC9723777; doi:10.1038/s43705-021-00064-6), 2021-10-20

Tree scale: 0.01

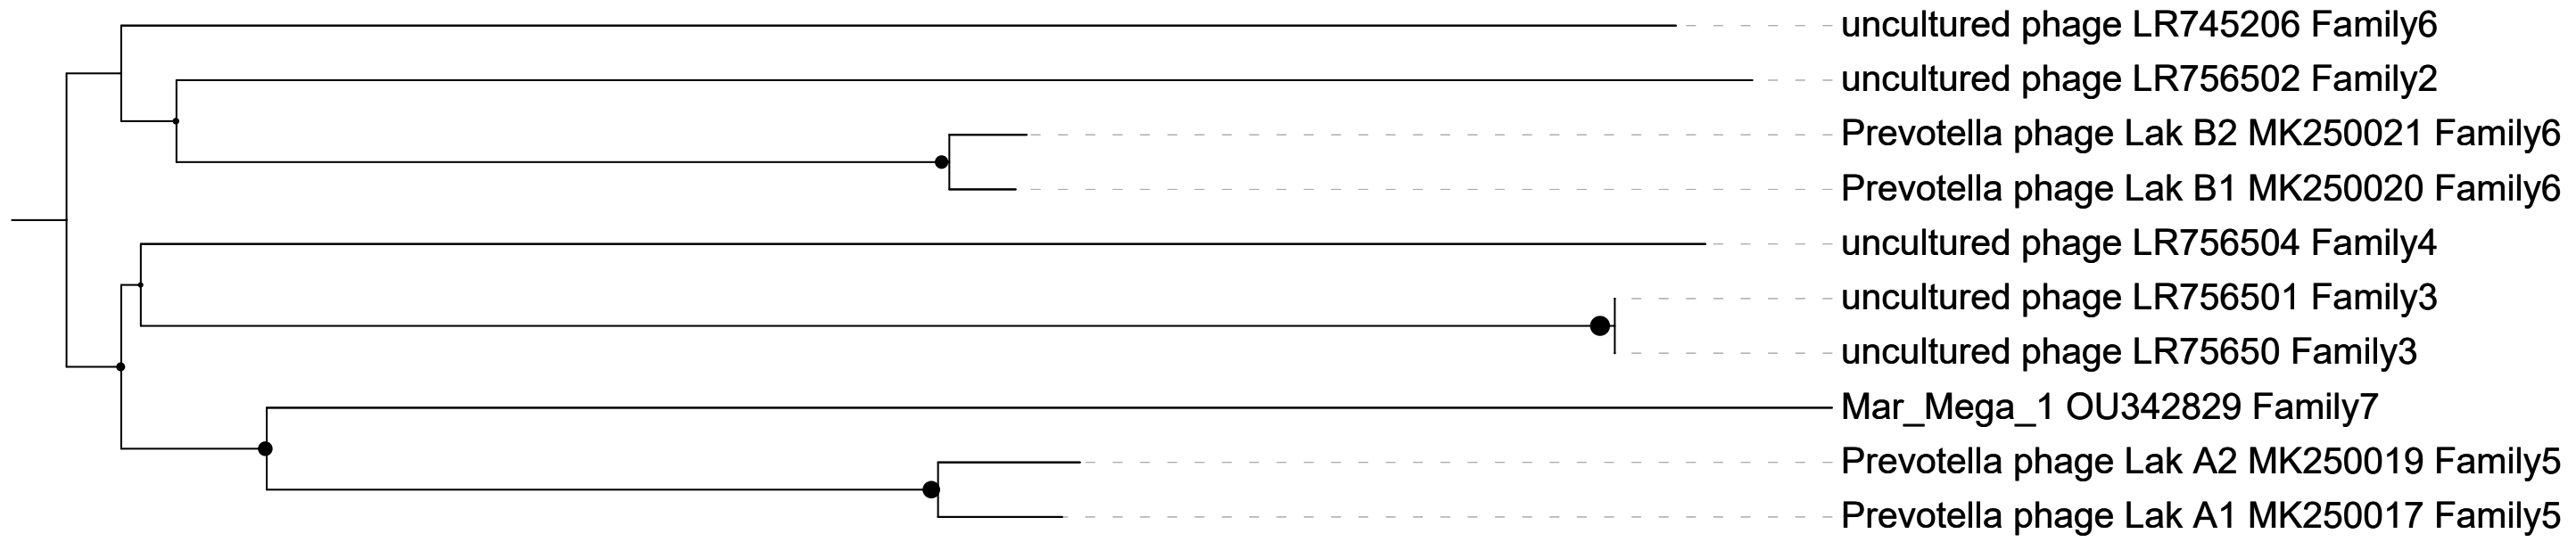

Supplement: 43705_2021_64_MOESM5_ESM.pdf [file 43705_2021_64_MOESM5_ESM.pdf]
